# Supplementary material for: Efficacy and safety of hepatic artery infusion chemotherapy combined with tyrosine kinase inhibitors plus programmed death-1 inhibitors for hepatocellular carcinoma refractory to transarterial chemoembolization
Source: PubMed Central journal article supplement (PMC10189040; doi:10.3389/fonc.2023.1178428), 2023-05-03
Supplement: DataSheet_1.pdf [file DataSheet_1.pdf]

Supplementary material Table 1. Treatment response as assessed by imaging features according to the mRECIST criteria in two groups before and after PSM analysis

| Curative effect             | Before PSM         |                  | <i>P value</i> | After PSM          |                  | <i>P value</i> |
|-----------------------------|--------------------|------------------|----------------|--------------------|------------------|----------------|
|                             | HAIC+L+P<br>(n=75) | HAIC+L<br>(n=74) |                | HAIC+L+P<br>(n=48) | HAIC+L<br>(n=48) |                |
| Complete response (CR)      | 1(1.33%)           | 1(1.35%)         |                | 1(2.08%)           | 1(2.08%)         |                |
| Partial response (PR)       | 33(44.00%)         | 24(32.43%)       |                | 21(43.75%)         | 15(31.25%)       |                |
| Stable disease (SD)         | 25(33.33%)         | 21(28.37%)       |                | 16(33.33%)         | 13(25.00%)       |                |
| Progressive disease (PD)    | 16(21.33%)         | 28(37.83%)       |                | 10(20.83%)         | 19(39.58%)       |                |
| Overall response rate (ORR) | 34(45.33%)         | 25(33.78%)       | 0.146          | 22(45.83%)         | 16(33.33%)       | 0.210          |
| Disease control rate (DCR)  | 59(78.66%)         | 46(62.16%)       | 0.027          | 38(79.16%)         | 29(60.41%)       | 0.045          |

Abbreviations: mRECIST, Modified Response Evaluation Criteria in Solid Tumours; HAIC, hepatic artery infusion chemotherapy. PSM, propensity score matching.

Supplementary material Table 2. Univariable and multivariable Cox regression analyses for time to OS before and after PSM analysis

| Characteristics         | Before PSM           |                  |                        |                | After PSM            |                |                        |                |
|-------------------------|----------------------|------------------|------------------------|----------------|----------------------|----------------|------------------------|----------------|
|                         | Univariable analysis |                  | Multivariable analysis |                | Univariable analysis |                | Multivariable analysis |                |
|                         | HR (95% CI)          | <i>P</i> value   | HR (95% CI)            | <i>P</i> value | HR (95% CI)          | <i>P</i> value | HR (95% CI)            | <i>P</i> value |
| therapy options         |                      | <b>0.003</b>     |                        | <b>0.001</b>   |                      | <b>0.030</b>   |                        | <b>0.011</b>   |
| HAIC+L+P                | reference            |                  | reference              |                | reference            |                | reference              |                |
| HAIC+L                  | 1.837(1.226-2.753)   |                  | 2.009(1.332-3.029)     |                | 1.740(1.056-2.867)   |                | 1.931(1.166-3.198)     |                |
| Age (years)             | 1.001(0.982-1.019)   | 0.947            |                        |                | 0.990(0.967-1.014)   | 0.413          |                        |                |
| Sex                     |                      | 0.429            |                        |                |                      | 0.550          |                        |                |
| Male                    | 1.266(0.705-2.274)   |                  |                        |                | 1.254(0.596-2.639)   |                |                        |                |
| Female                  | reference            |                  |                        |                | reference            |                |                        |                |
| etiology of HCC         |                      | <b>0.012</b>     |                        | 0.114          |                      | 0.376          |                        |                |
| HBV                     | 2.121(1.178-3.817)   |                  | 1.614(0.888-3.032)     |                | 1.516(0.604-3.803)   |                |                        |                |
| Others                  | reference            |                  | reference              |                | reference            |                |                        |                |
| Child Pugh score        |                      | <b>0.026</b>     |                        | <b>0.031</b>   |                      | 0.785          |                        |                |
| 5-6                     | reference            |                  | reference              |                | reference            |                |                        |                |
| 7-9                     | 1.619(1.058-2.477)   |                  | 1.612(1.044-2.488)     |                | 1.082(0.613-1.912)   |                |                        |                |
| Cirrhosis               |                      | 0.753            |                        |                |                      | 0.958          |                        |                |
| Yes                     | reference            |                  |                        |                | reference            |                |                        |                |
| No                      | 0.965(0.772-1.206)   |                  |                        |                | 0.985(0.551-1.760)   |                |                        |                |
| BCLC stage              |                      | 0.228            |                        |                |                      | 0.211          |                        |                |
| B                       | reference            |                  |                        |                | reference            |                |                        |                |
| C                       | 1.285(0.855-1.930)   |                  |                        |                | 1.376(0.835-2.267)   |                |                        |                |
| Portal vein invasion    |                      | 0.599            |                        |                |                      | 0.135          |                        |                |
| Yes                     | 1.115(0.743-1.1.674) |                  |                        |                | 1.470(0.887-2.436)   |                |                        |                |
| No                      | reference            |                  |                        |                | reference            |                |                        |                |
| Tumor numbers           |                      | 1.000            |                        |                |                      | 0.238          |                        |                |
| ≤3                      | reference            |                  |                        |                | reference            |                |                        |                |
| >3                      | 1.000(0.463-2.161)   |                  |                        |                | 1.671(0.712-3.922)   |                |                        |                |
| AFP (ng/ml)             |                      | 0.533            |                        |                |                      |                |                        |                |
| >400                    | reference            |                  |                        |                | reference            |                |                        |                |
| <400                    | 0.924(0.722-1.184)   |                  |                        |                | 0.828(0.503-1.364)   | 0.459          |                        |                |
| Extrahepatic metastases |                      | 0.247            |                        |                |                      | 0.390          |                        |                |
| Yes                     | 1.278(0.844-1.936)   |                  |                        |                | 1.253(0.750-2.094)   |                |                        |                |
| No                      | reference            |                  |                        |                | reference            |                |                        |                |
| APFs                    |                      | <b>&lt;0.001</b> |                        | <b>0.001</b>   |                      | <b>0.016</b>   |                        | <b>0.006</b>   |
| Yes                     | reference            |                  | reference              |                | reference            |                | reference              |                |
| No                      | 0.466(0.306-0.709)   |                  | 0.468(0.304-0.720)     |                | 0.534(0.320-0.891)   |                | 0.486(0.290-0.815)     |                |
| Largest tumor size (cm) | 1.050(0.995-1.107)   | 0.077            |                        |                | 1.074(1.002-1.153)   | 0.065          |                        |                |

*Abbreviations:* HR, hazard ratio; CI, confidence interval; HAIC, hepatic artery infusion chemotherapy; HBV, hepatitis B virus; BCLC, Barcelona Clinic Liver Cancer; PVTT, portal vein tumor thrombosis; AFP, alpha-fetoprotein; CA199, carbohydrate antigen 199; APFs, arteriportal fistulas. PSM, propensity score matching.

Supplementary material Table 3. Univariable and multivariable cox regression analyses for time to PFS before and after PSM analysis

| Characteristics         | Before PSM           |                  |                        |                  | After PSM            |                |                        |                |              |
|-------------------------|----------------------|------------------|------------------------|------------------|----------------------|----------------|------------------------|----------------|--------------|
|                         | Univariable analysis |                  | Multivariable analysis |                  | Univariable analysis |                | Multivariable analysis |                |              |
|                         | HR (95% CI)          | <i>P</i> value   | HR (95% CI)            | <i>P</i> value   | HR (95% CI)          | <i>P</i> value | HR (95% CI)            | <i>P</i> value |              |
| therapy options         |                      | <b>&lt;0.001</b> |                        | <b>&lt;0.001</b> |                      |                |                        | <b>0.037</b>   | <b>0.037</b> |
| HAIC+L+P                | 2.079(1.382-3.126)   |                  | 2.175(1.438-3.289)     |                  | 1.704(1.034-2.807)   |                | 1.704(1.034-2.807)     |                |              |
| HAIC+L)                 | reference            |                  |                        |                  | reference            |                |                        |                |              |
| Age (years)             | 1.004(0.985-1.022)   | 0.702            |                        |                  | 0.992(0.969-1.016)   | 0.506          |                        |                |              |
| Sex                     |                      | 0.630            |                        |                  |                      | 0.836          |                        |                |              |
| Male                    | 1.155(0.643-2.073)   |                  |                        |                  | 1.082(0.514-2.277)   |                |                        |                |              |
| Female                  | reference            |                  |                        |                  | reference            |                |                        |                |              |
| etiology of HCC         |                      | <b>0.004</b>     |                        | 0.058            |                      | 0.237          |                        |                |              |
| HBV                     | 2.362(1.310-4.259)   |                  | 1.824(0.981-3.395)     |                  | 1.743(0.693-4.384)   |                |                        |                |              |
| Others                  | reference            |                  |                        |                  | reference            |                |                        |                |              |
| Child Pugh score        |                      | <b>0.037</b>     |                        | <b>0.031</b>     |                      | 0.983          |                        |                |              |
| 5-6                     | reference            |                  | reference              |                  | reference            |                |                        |                |              |
| 7-9                     | 1.573(1.027-2.409)   |                  | 1.612(1.044-2.492)     |                  | 1.006(0.569-1.779)   |                |                        |                |              |
| Cirrhosis               |                      | 0.984            |                        |                  |                      | 0.722          |                        |                |              |
| Yes                     | reference            |                  |                        |                  | reference            |                |                        |                |              |
| No                      | 0.998(0.799-1.245)   |                  |                        |                  | 0.986(0.622-1.287)   |                |                        |                |              |
| BCLC stage              |                      | 0.546            |                        |                  |                      | 0.457          |                        |                |              |
| B                       | reference            |                  |                        |                  | reference            |                |                        |                |              |
| C                       | 1.134(0.753-1.708)   |                  |                        |                  | 1.209(0.734-1.991)   |                |                        |                |              |
| Portal vein invasion    |                      | 0.913            |                        |                  |                      | 0.231          |                        |                |              |
| Yes                     | reference            |                  |                        |                  | reference            |                |                        |                |              |
| No                      | 0.977(0.649-1.473)   |                  |                        |                  | 0.964(0.521-1.265)   |                |                        |                |              |
| Tumor numbers           |                      | 0.867            |                        |                  |                      | 0.367          |                        |                |              |
| ≤3                      | 0.936(0.433-2.025)   |                  |                        |                  | 0.977(0.633-2.445)   |                |                        |                |              |
| >3                      | reference            |                  |                        |                  | reference            |                |                        |                |              |
| AFP (ng/ml)             |                      | 0.600            |                        |                  |                      | 0.354          |                        |                |              |
| >400                    | reference            |                  |                        |                  | reference            |                |                        |                |              |
| <400                    | 0.908(0.632-1.304)   |                  |                        |                  | 0.791(0.0.482-1.298) |                |                        |                |              |
| Extrahepatic metastases |                      | 0.550            |                        |                  |                      | 0.758          |                        |                |              |
| Yes                     | 1.136(0.748-1.723)   |                  |                        |                  | 1.084(0.648-1.814)   |                |                        |                |              |
| No                      | reference            |                  |                        |                  | reference            |                |                        |                |              |
| APFs                    |                      | <b>0.003</b>     |                        | <b>0.006</b>     |                      | 0.055          |                        |                |              |
| Yes                     | reference            |                  | reference              |                  | reference            |                |                        |                |              |
| No                      | 0.536(0.352-0.814)   |                  | 0.546(0.354-0.841)     |                  | 0.607(0.365-1.011)   |                |                        |                |              |
| Largest tumor size (cm) | 1.042(0.988-1.099)   | 0.127            |                        |                  | 1.062(0.992-1.138)   | 0.085          |                        |                |              |

*Abbreviations:* HR, hazards ratio; CI, confidence interval; HAIC, hepatic artery infusion chemotherapy; HBV, hepatitis B virus; BCLC, Barcelona Clinic Liver Cancer; PVTT, portal vein tumor thrombus; AFP, alpha-fetoprotein; CA199, carbohydrate antigen 199; APFs, arterioportal fistulas. PSM, propensity score matching.

Supplementary material Table 4. Comparison of Child Pugh classification before treatment and after different numbers HAIC courses treatment in the HAIC+L+P group and HAIC+L group.

| treatment course | Variable                    | HAIC+L+P       |               | <i>P</i> value | HAIC+L+        |               | <i>P</i> value |
|------------------|-----------------------------|----------------|---------------|----------------|----------------|---------------|----------------|
|                  |                             | Before therapy | After therapy |                | Before therapy | After therapy |                |
| 2 HAIC course    | Child Pugh classification A | 55(73.33%)     | 53(70.66%)    | 0.716          | 52(70.27%)     | 51(68.91%)    | 0.858          |
|                  | B                           | 20(26.67%)     | 22(29.34%)    |                | 22(29.73%)     | 23(31.09%)    |                |
| 3 HAIC course    | Child Pugh classification A | 55(73.33%)     | 48(64.00%)    | 0.218          | 52(70.27%)     | 54(72.97%)    | 0.715          |
|                  | B                           | 20(26.67%)     | 27(36.00%)    |                | 22(29.73%)     | 20(27.03%)    |                |
| 3 HAIC course    | Child Pugh classification A | 55(73.33%)     | 50(66.66%)    | 0.373          | 52(70.27%)     | 55(74.32%)    | 0.582          |
|                  | B                           | 20(26.67%)     | 25(33.37%)    |                | 22(29.73%)     | 19(25.68%)    |                |
| 4 HAIC course    | Child Pugh classification A | 55(73.33%)     | 57(76.00%)    | 0.707          | 52(70.27%)     | 50(67.56%)    | 0.722          |
|                  | B                           | 20(26.67%)     | 18(24.00%)    |                | 22(29.73%)     | 24(32.44%)    |                |
| 5 HAIC course    | Child Pugh classification A | 55(73.33%)     | 52(69.33%)    | 0.588          | 52(70.27%)     | 48(64.86%)    | 0.535          |
|                  | B                           | 20(26.67%)     | 23(30.67%)    |                | 22(29.73%)     | 16(35.14%)    |                |
| 6 HAIC course    | Child Pugh classification A | 55(73.33%)     | 50(66.66%)    | 0.373          | 52(70.27%)     | 56(75.67%)    | 0.459          |
|                  | B                           | 20(26.67%)     | 25(33.37%)    |                | 22(29.73%)     | 18(24.33%)    |                |
| 7 HAIC course    | Child Pugh classification A | 55(73.33%)     | 51(68.00%)    | 0.473          | 52(70.27%)     | 50(67.56%)    | 0.722          |
|                  | B                           | 20(26.67%)     | 24(32.00%)    |                | 22(29.73%)     | 24(32.44%)    |                |

*Abbreviations:* mRECIST, Modified Response Evaluation Criteria in Solid Tumours; HAIC, hepatic artery infusion chemotherapy; PD-1, programmed death-1.

## **Supplementary material Figure legends**

**Supplementary material Figure 1.** Kaplan–Meier analysis of overall survival in patients receiving the combination therapy of HAIC, lenvatinib plus PD-1 inhibitor, and HAIC plus lenvatinib therapy after PSM analysis. HAIC, hepatic artery infusion chemotherapy; PD-1, programmed cell death-1; PSM, propensity score matching.

**Supplementary material Figure 2.** Kaplan–Meier analysis of progression-free survival in patients receiving the combination therapy of HAIC, lenvatinib plus PD-1 inhibitor, and HAIC plus lenvatinib therapy after PSM analysis. HAIC, hepatic artery infusion chemotherapy; PD-1, programmed cell death-1; PSM, propensity score matching.

**Supplementary material Figure 3.** Kaplan–Meier analysis of overall survival in patients receiving the numbers of HAIC courses. HAIC, hepatic artery infusion chemotherapy; PD-1, programmed cell death-1.

**Supplementary material Figure 4.** Kaplan–Meier analysis of progression-free survival in patients receiving the numbers of HAIC courses. HAIC, hepatic artery infusion chemotherapy; PD-1, programmed cell death-1.

**Supplementary material Figure 5** This magnetic resonance (MR) images showed the imaging feature of 58-year-old men with HCC accompanied by portal vein tumor thrombosis (PVTT), which classified as the type 3 of portal vein tumor thrombosis using Cheng’s PVTT classification. T2 weighted imaging (A), contrast-enhanced MR scan (B) showed a giant tumor had a tumour thrombus in the left branch of the portal vein before HAIC combined with lenvatinib therapy; T2 weighted imaging (C), contrast-enhanced scan MR scan (D) showed a giant tumor with PVTT was completely inactive and achieved CR according to the mRECIST criteria after 5 courses of HAIC combined with lenvatinib therapy. HAIC, hepatic artery infusion chemotherapy; CR, complete response; mRECIST, the Modified Response Evaluation Criteria in Solid Tumors.

**Supplementary material Figure 6** This magnetic resonance (MR) images showed the imaging feature of 56-year-old woman with HCC accompanied by portal vein tumor

thrombosis (PVTT) and superior mesenteric vein tumor thrombosis (SMVTT), which classified as the type 4 of portal vein tumour thrombosis using Cheng's PVTT classification. T2 weighted imaging (A) (B), contrast-enhanced MR scan (C) showed multiple liver tumors had a tumor thrombus in portal vein and superior mesenteric vein before HAIC combined with lenvatinib plus PD-1 inhibitors therapy; T2 weighted imaging (D) (E), contrast-enhanced MR scan (F) showed multiple liver tumors with PVTT and SMVCT was partially active and achieved PR according to the mRECIST criteria after 3 courses of HAIC combined with lenvatinib plus PD-1 inhibitors therapy; T2 weighted imaging (G) (H), contrast-enhanced MR scan (I) showed multiple liver tumors with PVTT and SMVTT was completely inactive and achieved CR according to the mRECIST criteria after 6 courses of HAIC combined with lenvatinib plus PD-1 inhibitors therapy. The previously blocked portal vein and superior mesenteric vein due to PVTT and SMVTT also restores blood flow. HAIC, hepatic artery infusion chemotherapy; CR, complete response; mRECIST, the Modified Response Evaluation Criteria in Solid Tumors.
